# Supplementary material for: Enrofloxacin Rapid Detection in Aquatic Foods: Based on DNA Aptamer Sensor
Source: MDPI journal article supplement (doi:10.3390/foods13060941), 2024-03-20
Supplement: s1 [file s1]

# Enrofloxacin Rapid Detection in Aquatic Foods: based on DNA

## Aptamer Sensor

Xiuli Bao<sup>1,2</sup>, Siyuan Wang<sup>1,2</sup>, Qingfang Hao<sup>1,2</sup>, Yue Bai<sup>1,2</sup>, Siying Li<sup>1,2</sup>, Shuai Zhang<sup>1,2</sup>, Lei Zhang<sup>1,2</sup>, Xinxin Kang<sup>1,2</sup>, Mingsheng Lyu<sup>1,2</sup>, Shujun Wang<sup>1,2,\*</sup>

<sup>1</sup>Jiangsu Key Laboratory of Marine Bioresources and Environment/Jiangsu Key Laboratory of Marine Biotechnology, Jiangsu Ocean University, Lianyungang, 222005, China

<sup>2</sup>Co-Innovation Center of Jiangsu Marine Bio-industry Technology, Jiangsu Ocean University, Lianyungang, 222005, China

\*Correspondence: sjwang@jou.edu.cn

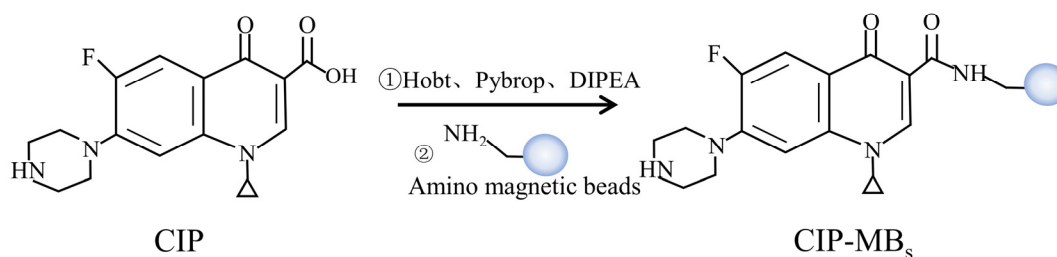

Figure.S1. Schematic diagram of CIP immobilization

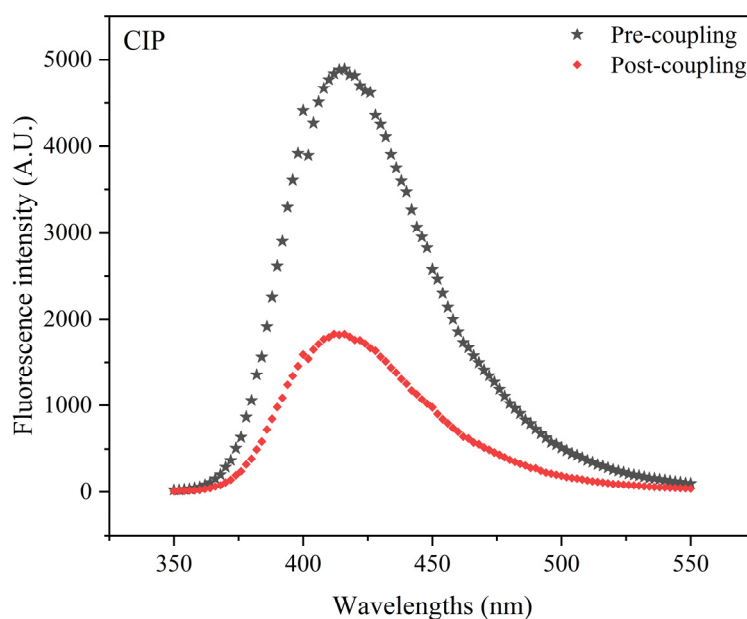

Figure.S2. CIP fluorescence intensity in solution before and after coupling

Table.S1 Candidate aptamer sequences and their characteristics

| Name      | Sequence (5'-3')            | enrichment<br>ratio<br>(%) | dG<br>(kcal/mol) | GC<br>(%) |
|-----------|-----------------------------|----------------------------|------------------|-----------|
| ENR-Apt 1 | GCGGCTGCTTACGGATAGAACCATGG  | 21.2                       | -8.29            | 56        |
|           | AGCCAATGGAACTTTAGTTGTGCATC  |                            |                  |           |
|           | TCCCATCCGTAAAGCCCAAGTC      |                            |                  |           |
| ENR-Apt 2 | GCGGCTGCTTACGGATAGAACGAGGT  | 8.62                       | -8.84            | 60        |
|           | ACATGGATGTTAAGCTTACCCGCGGTT |                            |                  |           |
|           | GCCCATCCGTAAAGCCCAAGTC      |                            |                  |           |
| ENR-Apt 3 | GCGGCTGCTTACGGATAGAAGACGGA  | 2.74                       | -10.92           | 60        |
|           | TCCGTCGGATATGTCGTACGAAGCAGG |                            |                  |           |
|           | TGCCATCCGTAAAGCCCAAGTC      |                            |                  |           |
| ENR-Apt 4 | GCGGCTGCTTACGGATAGAACCACGT  | 2.47                       | -8.14            | 60        |
|           | ATGTAACTTGAGGTTAGGCATCGGTC  |                            |                  |           |
|           | CCCCATCCGTAAAGCCCAAGTC      |                            |                  |           |
| ENR-Apt 5 | GCGGCTGCTTACGGATAGAAGCGGGA  | 1.44                       | -10.01           | 64        |
|           | TCTAGTCAAAGCGGAACGGGATCAAC  |                            |                  |           |
|           | GAACCATCCGTAAAGCCCAAGTC     |                            |                  |           |
| ENR-Apt 6 | GCGGCTGCTTACGGATAGAAGGCGGA  | 0.69                       | -11.15           | 64        |
|           | TGGAGAAATGAACCGGGGTGGTCCGT  |                            |                  |           |
|           | TGTCCATCCGTAAAGCCCAAGTC     |                            |                  |           |

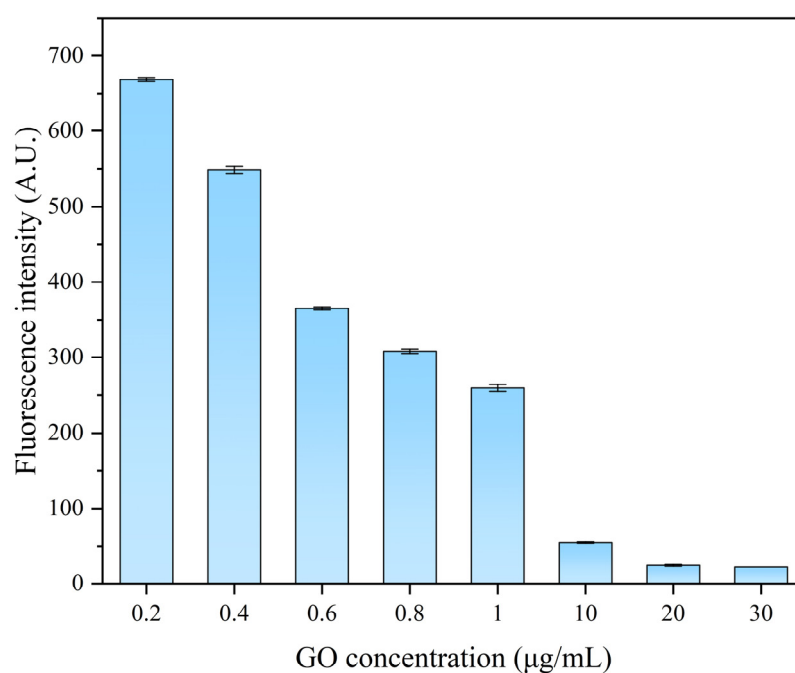

Figure.S3. Effect of fluorescence intensity on GO concentration

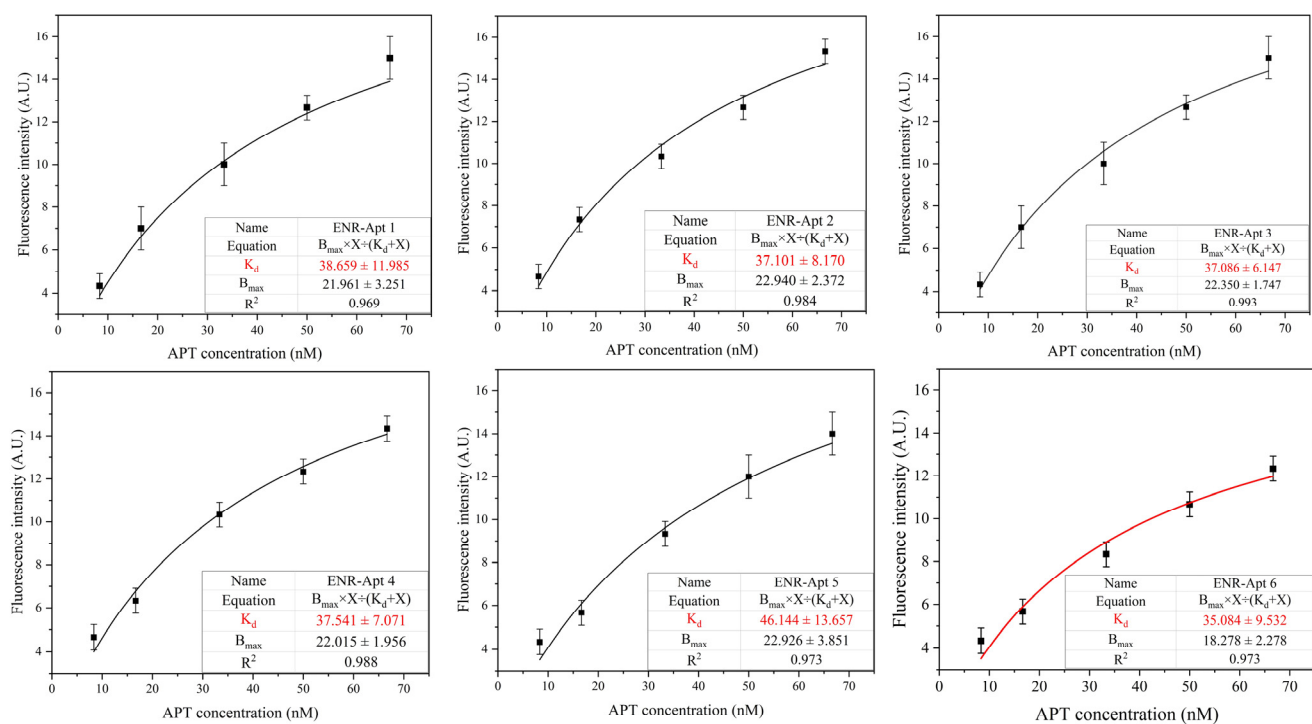

Figure.S4. Six candidate adaptors nonlinear fitting curves
